# Supplementary material
Source: MDPI journal article supplement (https://www.mdpi.com/2073-4352/13/4/701)
Supplement: s1 [file s1]

### Supporting Information

Xingchen Hu <sup>1</sup>, Yuntian Xiao <sup>1</sup>, Luguang Qi <sup>1</sup>, Yunhe Bai <sup>1</sup>, Ying Sun <sup>1</sup>, Yang Ye <sup>1</sup> and Chuang Xie <sup>1,2,3,\*</sup>

<sup>1</sup> School of Chemical Engineering and Technology, Tianjin University, Tianjin 300072, China

<sup>2</sup> National Engineering Research Center of Industrial Crystallization Technology, Tianjin University, Tianjin 300072, China

<sup>3</sup> State Key Laboratory of Chemical Engineering, Tianjin University, Tianjin 300072, China

\* Correspondence: acxie@tju.edu.cn

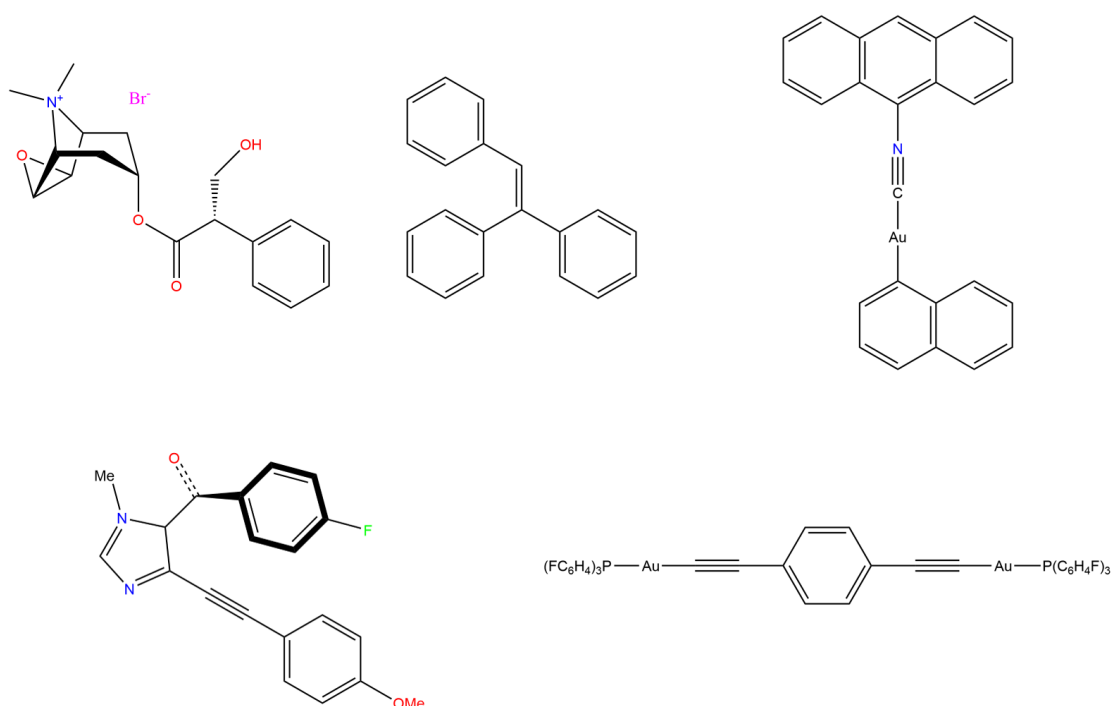

**Figure S1.** Molecular structural formulas of thermosalient crystals without phase transitions that have been previously reported.

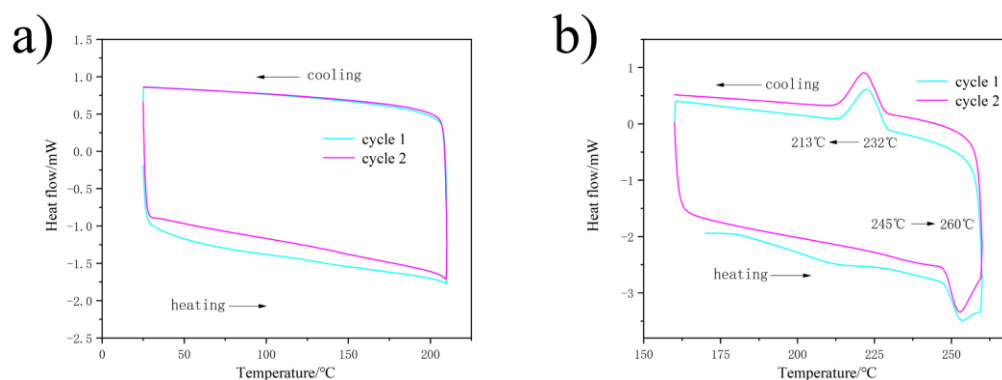

**Figure S2.** a) Differential scanning calorimetry thermograms of two cycles of TMP-25HBA powder. b) Differential scanning calorimetry thermograms of two cycles of TMP-OA powder.

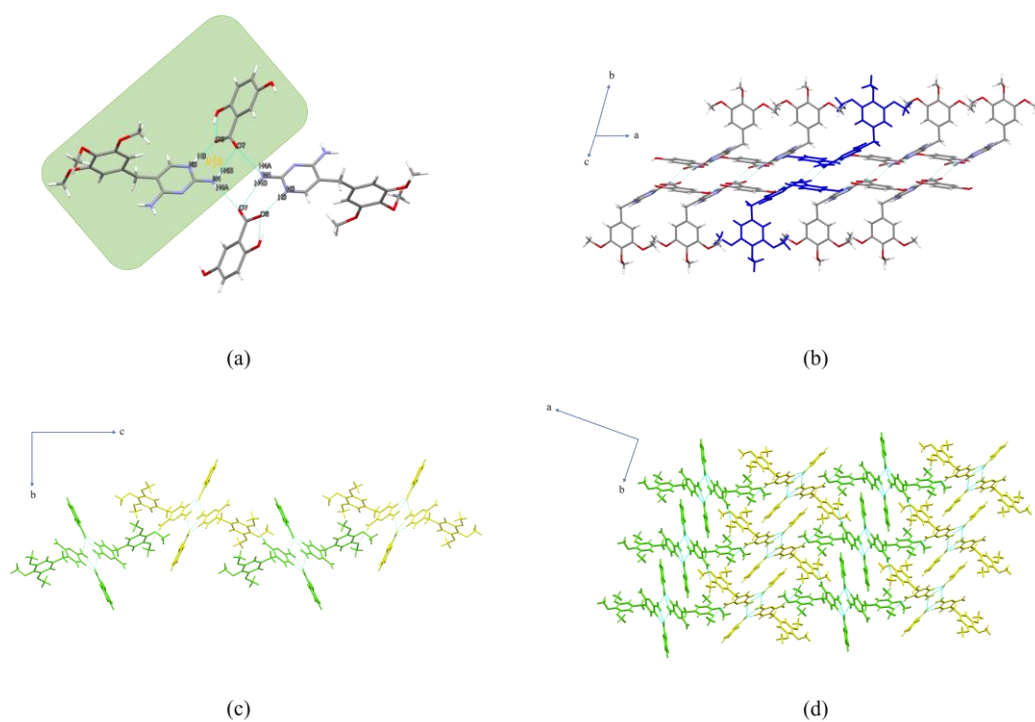

**Figure S3. (a) Tetramer of TMP with 25HBA; (b) 1 D chain formed by tetramers; (c) 2 D plane connected by 1 D chains (green and yellow) (d) 3 D structure arranged between 2 D planes.**

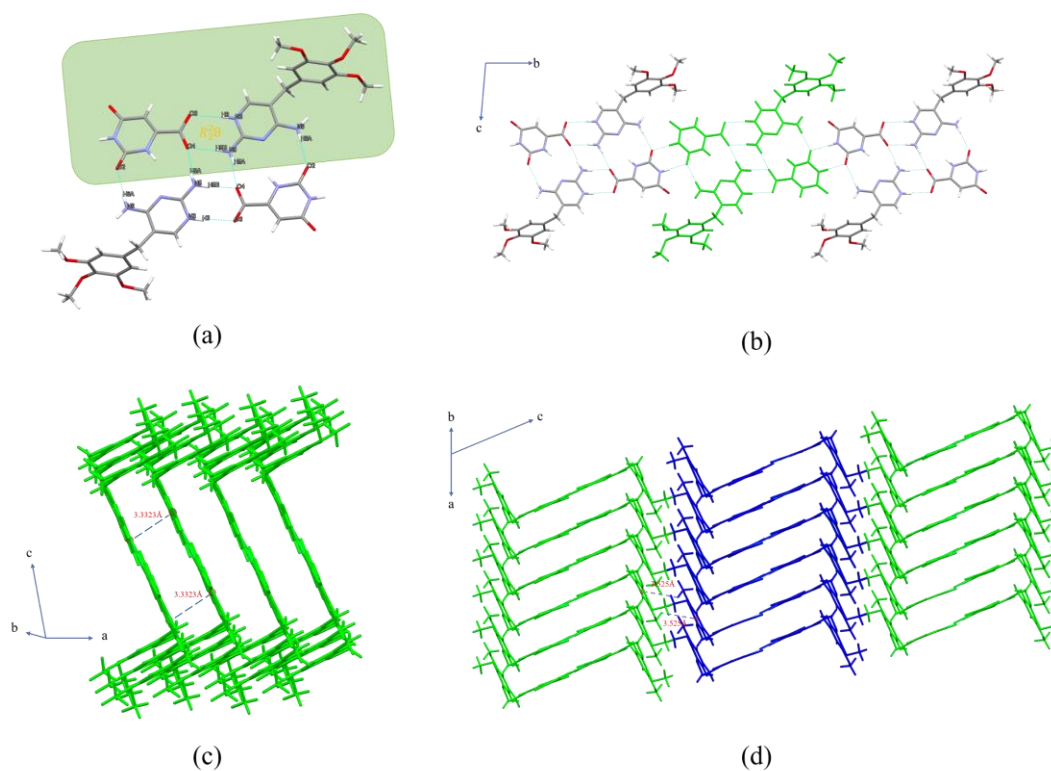

**Figure S4. (a) Tetramer formed between TMP and OA; (b) 1 D chain of Tetramers; (c) The plane connected between the chains; (d) Connection mode of TMP-OA between planes.**

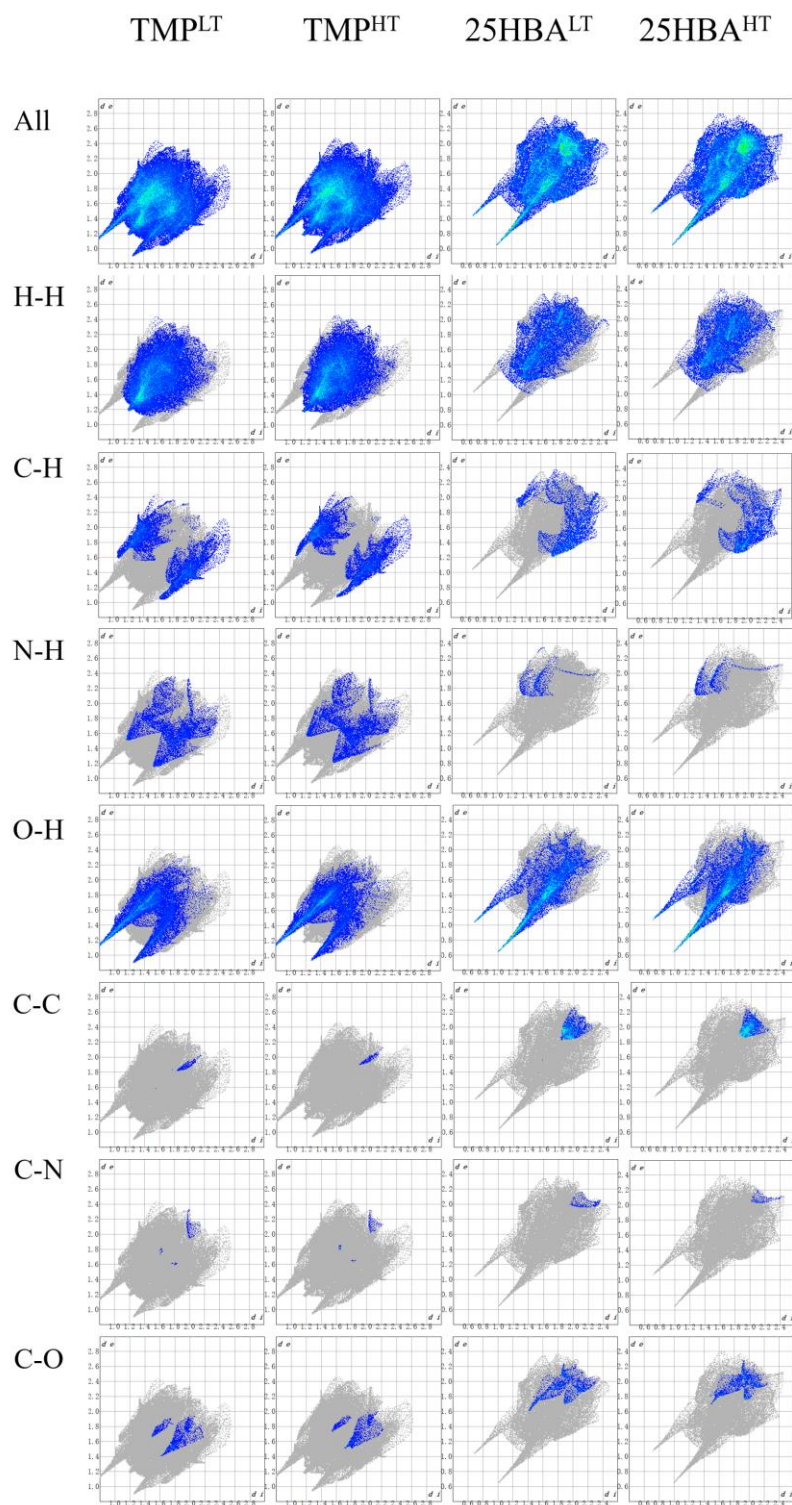

**Figure S5.** 2D fingerprints of different molecules in TMP-25HBA crystals (HT is high temperature, LT is low temperature).

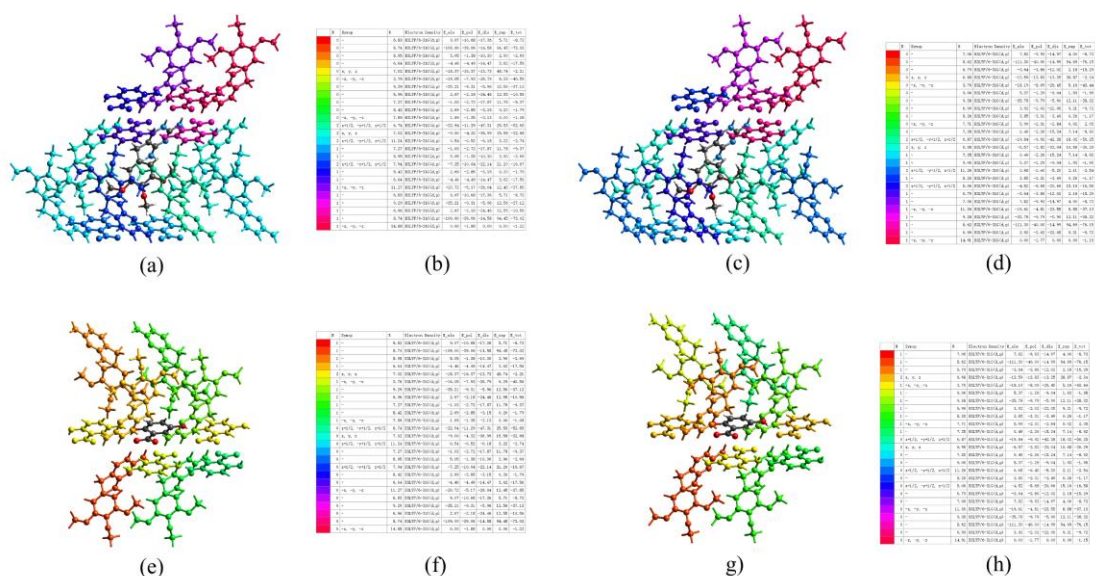

Figure S6. (a) and (b) are the energy calculation results of TMP in TMP-25HBA<sup>LT</sup>; (e) and (f) are the energy calculation results of 25HBA in TMP-25HBA<sup>LT</sup>; (c) and (d) are the energy calculation results of TMP in TMP-25HBA<sup>HT</sup>; (g) and (h) are the energy calculation results of 25HBA in TMP-25HBA<sup>HT</sup>;

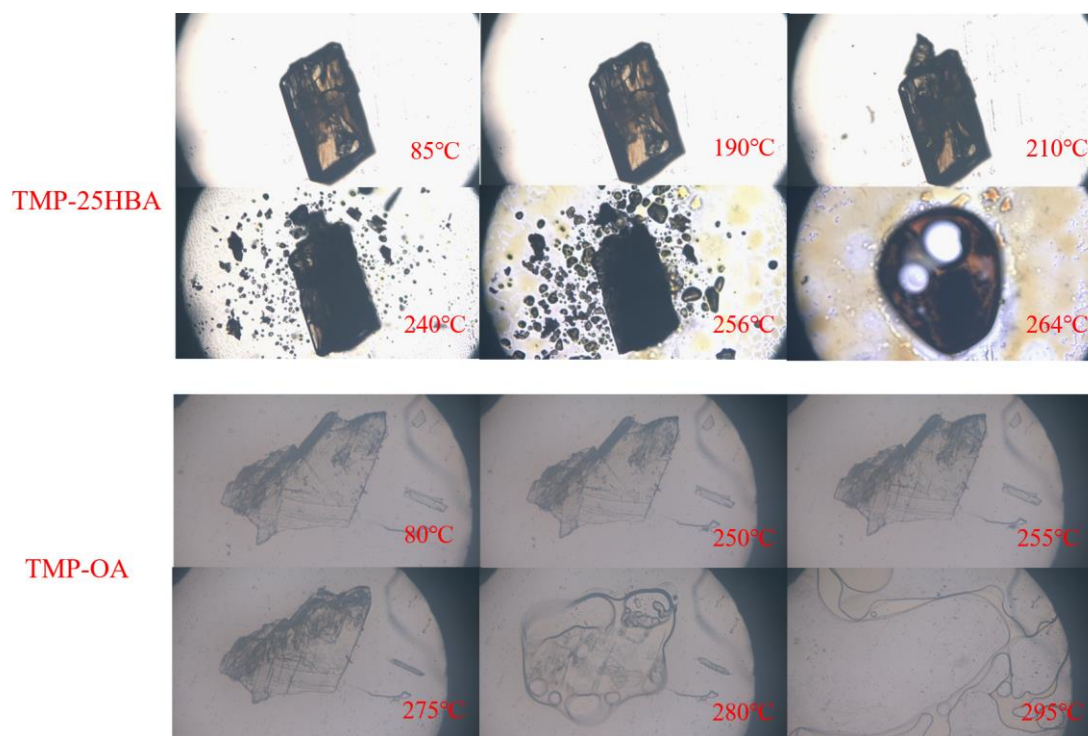

Figure S7. The melting point of the crystal was determined by HSM (To prevent the crystal from jumping out of sight, the crystal was covered with a glass sheet.) and the T(TS)/T(melting) was calculated. T(TS)/T(melting) of TMP-25HBA is 456.15K/513.15K (0.8889). T(TS)/T(melting) of TMP-OA is 533.15K/553.15K (0.9638).

**Table S1. Crystallographic Parameters of TMP-25HBA and TMP-OA.**

| Compound                               | TMP-25HBA                                                     | TMP-25HBA                                                     | TMP-OA                                                        |
|----------------------------------------|---------------------------------------------------------------|---------------------------------------------------------------|---------------------------------------------------------------|
| Empirical formula                      | C <sub>21</sub> H <sub>24</sub> N <sub>4</sub> O <sub>7</sub> | C <sub>21</sub> H <sub>24</sub> N <sub>4</sub> O <sub>7</sub> | C <sub>19</sub> H <sub>22</sub> N <sub>6</sub> O <sub>7</sub> |
| Formula weight                         | 444.44                                                        | 444.44                                                        | 446.42                                                        |
| Temperature (K)                        | 113.15                                                        | 463                                                           | 113.15                                                        |
| Crystal system                         | monoclinic                                                    | monoclinic                                                    | Triclinic                                                     |
| Space group                            | P 2 <sub>1</sub> /n                                           | P 2 <sub>1</sub> /n                                           | P $\bar{1}$                                                   |
| a (Å)                                  | 7.0172(3)                                                     | 6.977(3)                                                      | 7.0878(6)                                                     |
| b (Å)                                  | 28.2186(13)                                                   | 28.295(9)                                                     | 7.5969(7)                                                     |
| c (Å)                                  | 10.7877(5)                                                    | 11.103(4)                                                     | 18.9464(14)                                                   |
| $\alpha$ (°)                           | 90                                                            | 90                                                            | 91.152(7)                                                     |
| $\beta$ (°)                            | 103.469(5)                                                    | 103.232(12)                                                   | 98.566(7)                                                     |
| $\gamma$ (°)                           | 90                                                            | 90                                                            | 103.763(8)                                                    |
| Volume (Å <sup>3</sup> )               | 2077.38(17)                                                   | 2133.6(13)                                                    | 978.19(15)                                                    |
| Z                                      | 4                                                             | 4                                                             | 2                                                             |
| $P_{\text{calc}}$ (g/cm <sup>3</sup> ) | 1.421                                                         | 1.384                                                         | 1.516                                                         |
| $F(000)$                               | 936                                                           | 936                                                           | 468                                                           |
| Reflections collected                  | 26572                                                         | 19659                                                         | 14852                                                         |
| Goodness-of-fit on $F^2$               | 1.041                                                         | 1.029                                                         | 1.055                                                         |
| $R_{\text{int}}$                       | 0.0853                                                        | 0.0578                                                        | 0.0607                                                        |
| $R_1$ indexes [ $I > 2\sigma(I)$ ]     | 0.0659                                                        | 0.0638                                                        | 0.0757                                                        |
| w $R_2$ indexes [all data]             | 0.1675                                                        | 0.1886                                                        | 0.2146                                                        |
| CCDC                                   | 2221421                                                       | 2244908                                                       | 2221420                                                       |

**Table S2. Cell parameters of TMP-25HBA at different temperatures.**

| Temperature (°C) | a     | b      | c      | $\alpha$ | $\beta$ | $\gamma$ | V        |
|------------------|-------|--------|--------|----------|---------|----------|----------|
| 110              | 6.987 | 28.278 | 11.033 | 90.00    | 103.284 | 90.00    | 2121.555 |
| 130              | 6.984 | 28.282 | 11.054 | 90.00    | 103.271 | 90.00    | 2125.095 |
| 150              | 6.981 | 28.287 | 11.069 | 90.00    | 103.258 | 90.00    | 2127.555 |
| 170              | 6.979 | 28.291 | 11.088 | 90.00    | 103.245 | 90.00    | 2131.011 |
| 190              | 6.976 | 28.295 | 11.103 | 90.00    | 103.232 | 90.00    | 2133.392 |
| 210              | 6.974 | 28.299 | 11.122 | 90.00    | 103.219 | 90.00    | 2136.846 |

**Table S3. Cell parameters of TMP-OA at different temperatures.**

| Temperature (°C) | a      | b      | c       | $\alpha$ | $\beta$ | $\gamma$ | V        |
|------------------|--------|--------|---------|----------|---------|----------|----------|
| 175              | 7.5481 | 6.5489 | 18.9966 | 89.2995  | 93.7351 | 111.6612 | 870.8040 |
| 200              | 7.5516 | 6.5390 | 18.9982 | 89.2247  | 93.9695 | 111.5459 | 870.4046 |
| 225              | 7.5578 | 6.5296 | 19.0061 | 90.0603  | 93.4399 | 111.3246 | 872.1527 |
| 240              | 7.6024 | 6.5196 | 19.0187 | 89.2675  | 94.0260 | 111.0532 | 877.4877 |
| 255              | 7.7263 | 6.4637 | 19.0194 | 89.7826  | 93.4981 | 111.3522 | 882.9788 |
| 265              | 7.7250 | 6.4646 | 19.0156 | 89.9898  | 93.5448 | 110.8484 | 885.7546 |

**Movie S1:** Heating of TMP-25HBA starting at 180°C (heating rate 10 K/min).

**Movie S2:** Heating of TM-OA in cycle1 starting at 250°C (heating rate 10 K/min).

**Movie S3:** Cooling of TMP-OA in cycle1 starting at 234°C (cooling rate 10 K/min).

**Movie S4:** Heating of TM-OA in cycle2 starting at 248°C (heating rate 10 K/min).

**Movie S5:** Cooling of TMP-OA in cycle2 starting at 238°C (cooling rate 10 K/min).
